# Supplementary material for: Stability of diagnostic rate in a cohort of 38,813 colorectal polyp specimens and implications for histomorphology and statistical process control
Source: PubMed Central journal article supplement (PMC8379162; doi:10.1038/s41598-021-95862-2), 2021-08-20
Supplement: 41598_2021_95862_MOESM1_ESM.pdf [file 41598_2021_95862_MOESM1_ESM.pdf]

# **Supplemental Figures and Tables**

**for**

***Stability of Diagnostic Rate in a Cohort of 38,813  
Colorectal Polyp Specimens and Implications for  
Histomorphology and Statistical Process Control***

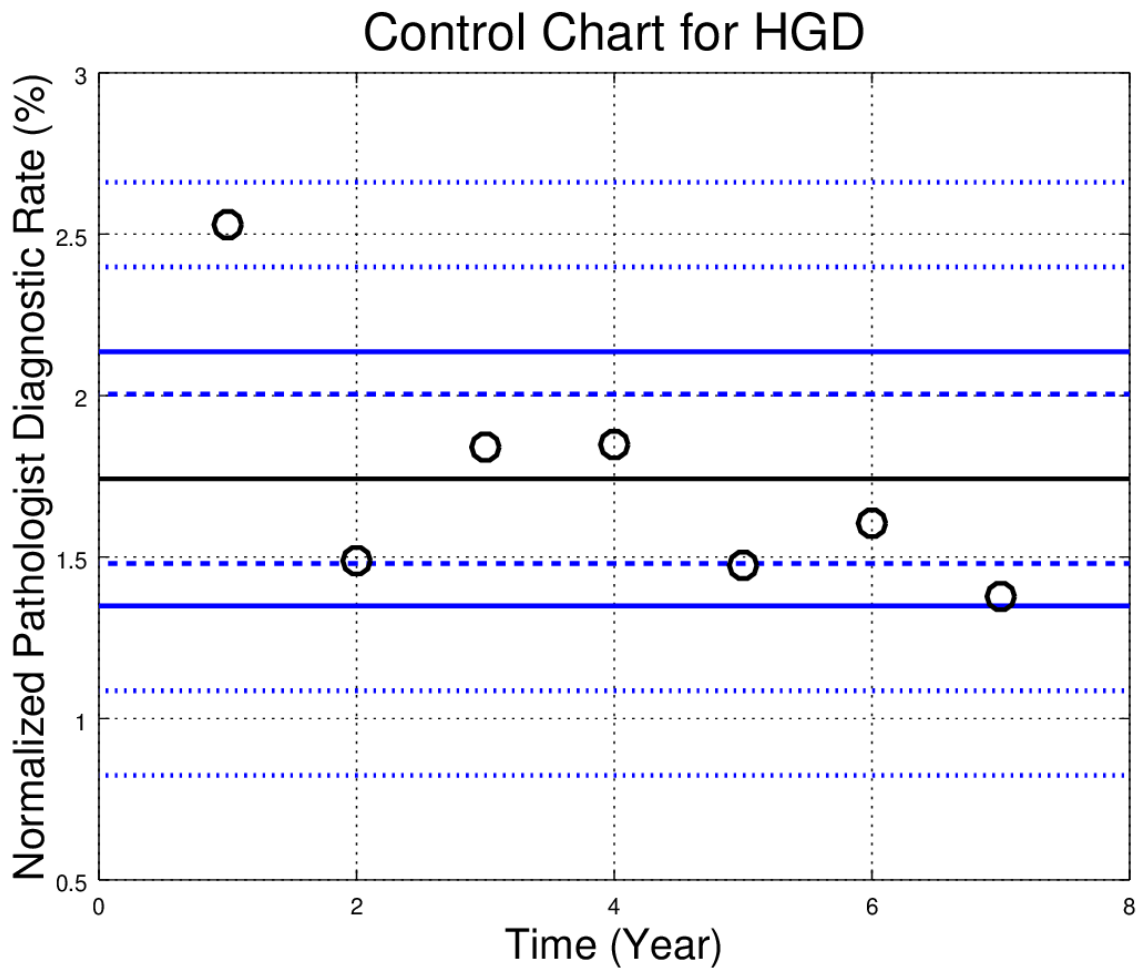

**Supplemental Figure A: Mean call rate of high-grade dysplasia (HGD) for each year of the study. The control lines are centred on the average call rate over the seven years of the study.**

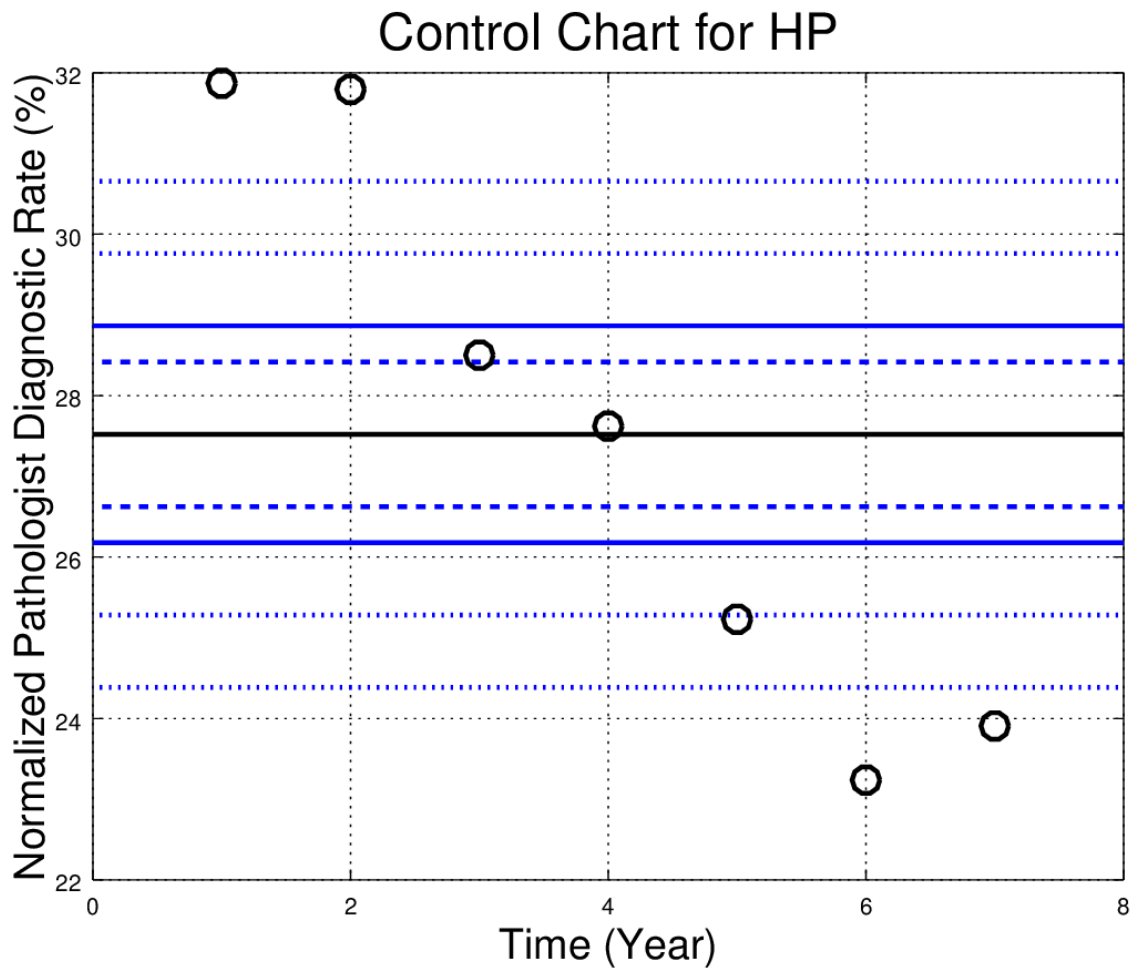

**Supplemental Figure B: Mean call rate of hyperplastic polyp (HP) for each year of the study. The control lines are centred on the average call rate over the seven years of the study.**

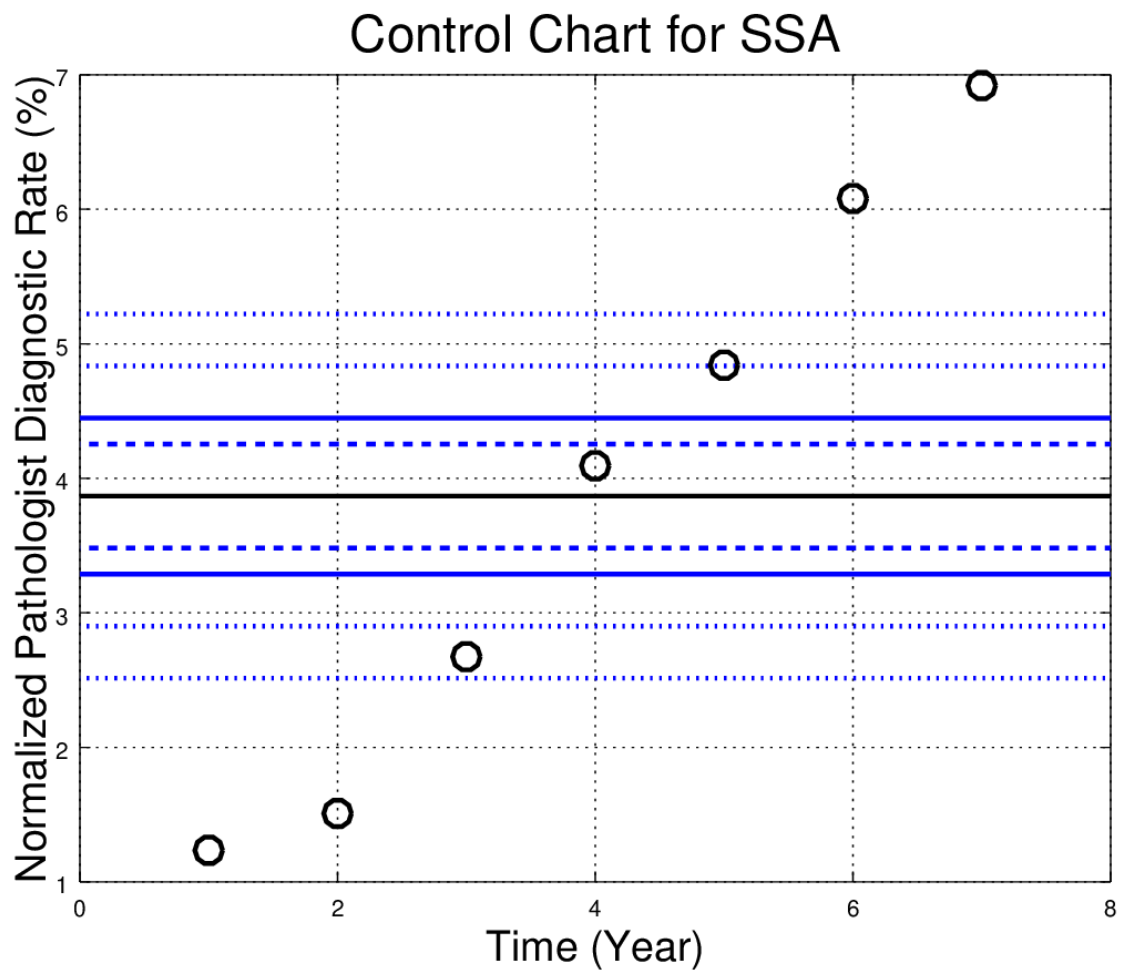

**Supplemental Figure C: Mean call rate of sessile serrated adenoma (SSA) for each year of the study. The control lines are centred on the average call rate over the seven years of the study.**

### Control Chart for TVA+VA

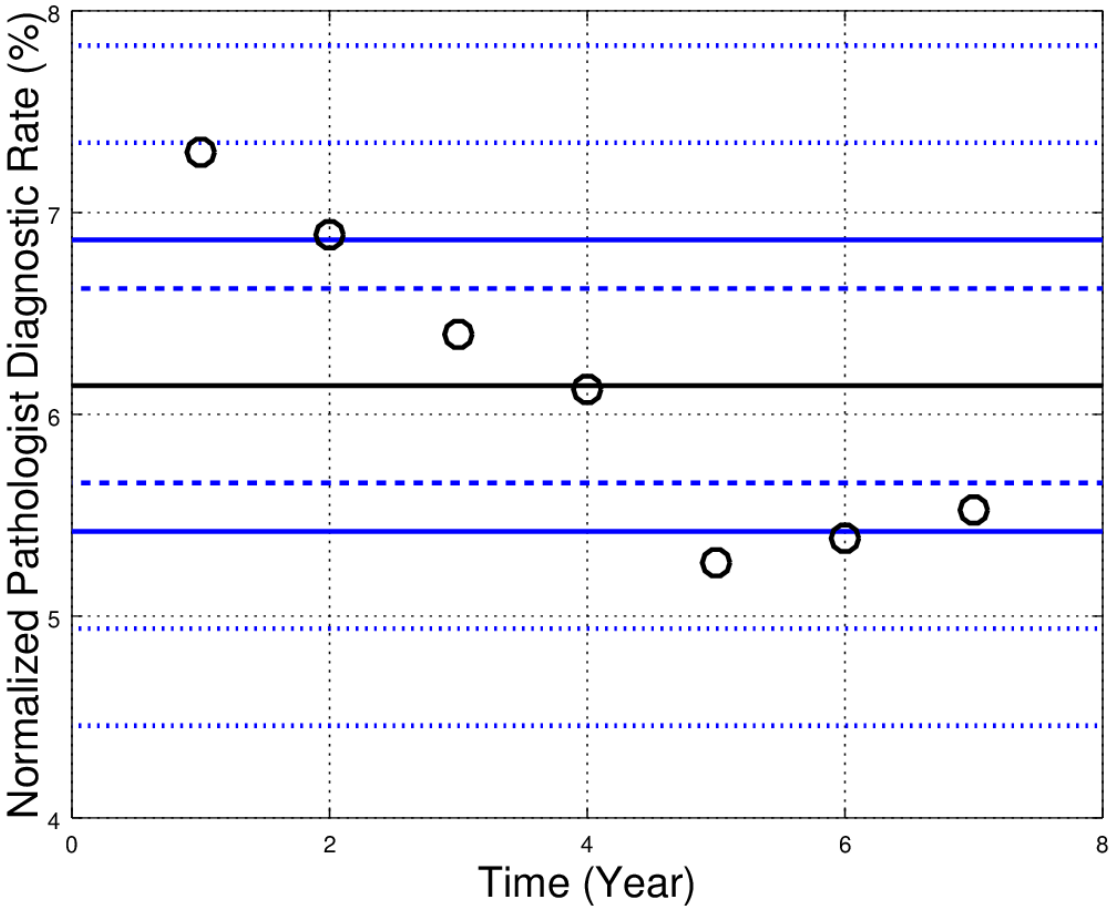

**Supplemental Figure D: Mean call rate of tubulovillous adenoma+villous adenoma (TVA+VA) for each year of the study. The control lines are centred on the average call rate over the seven years of the study.**

## Control Chart for TA+ad

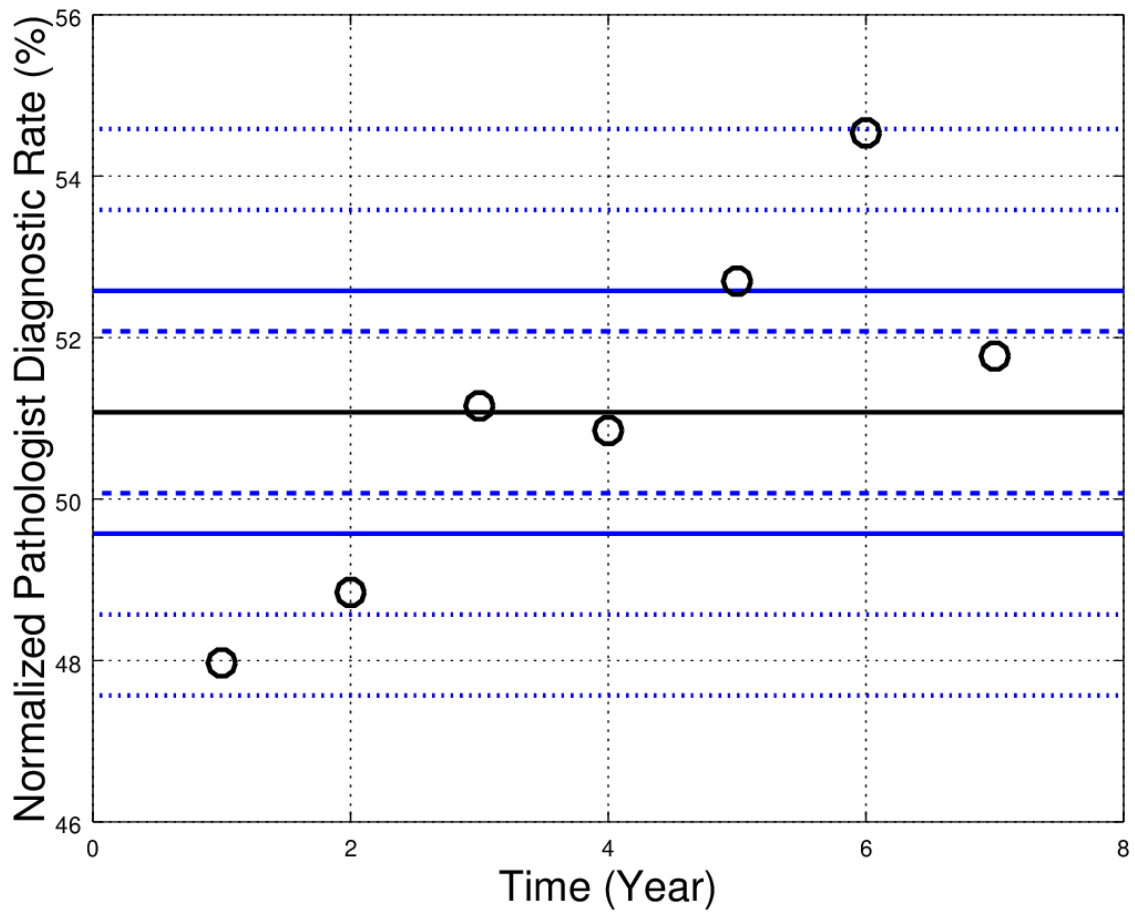

**Supplemental Figure E: Mean call rate of tubular adenoma+adenoma not otherwise specified (TA+ad) for each year of the study. The control lines are centred on the average call rate over the seven years of the study.**

### Control Chart for HP+SSA

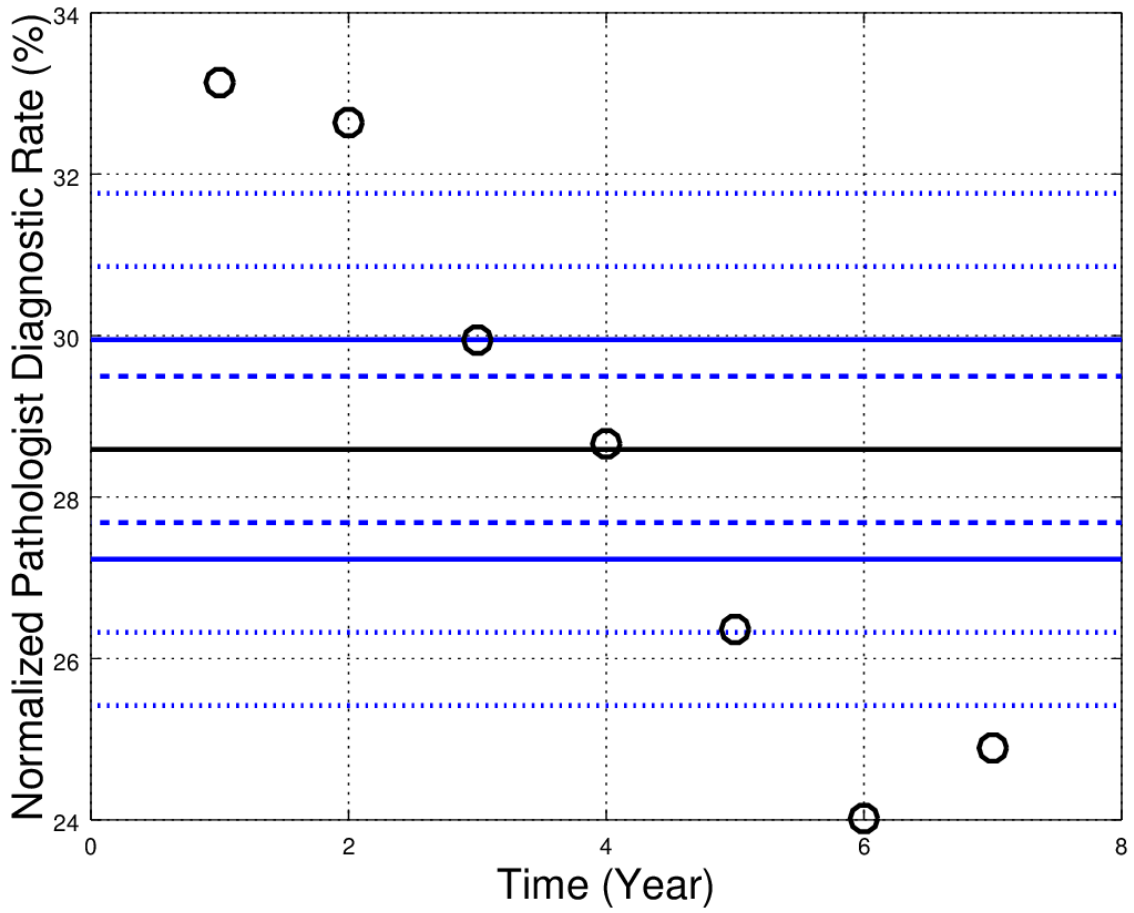

**Supplemental Figure F: Mean call rate of hyperplastic polyp+sessile serrated adenoma (HP+SSA) for each year of the study. The control lines are centred on the average call rate over the seven years of the study.**

### Control Chart for TA+TVA+VA+ad

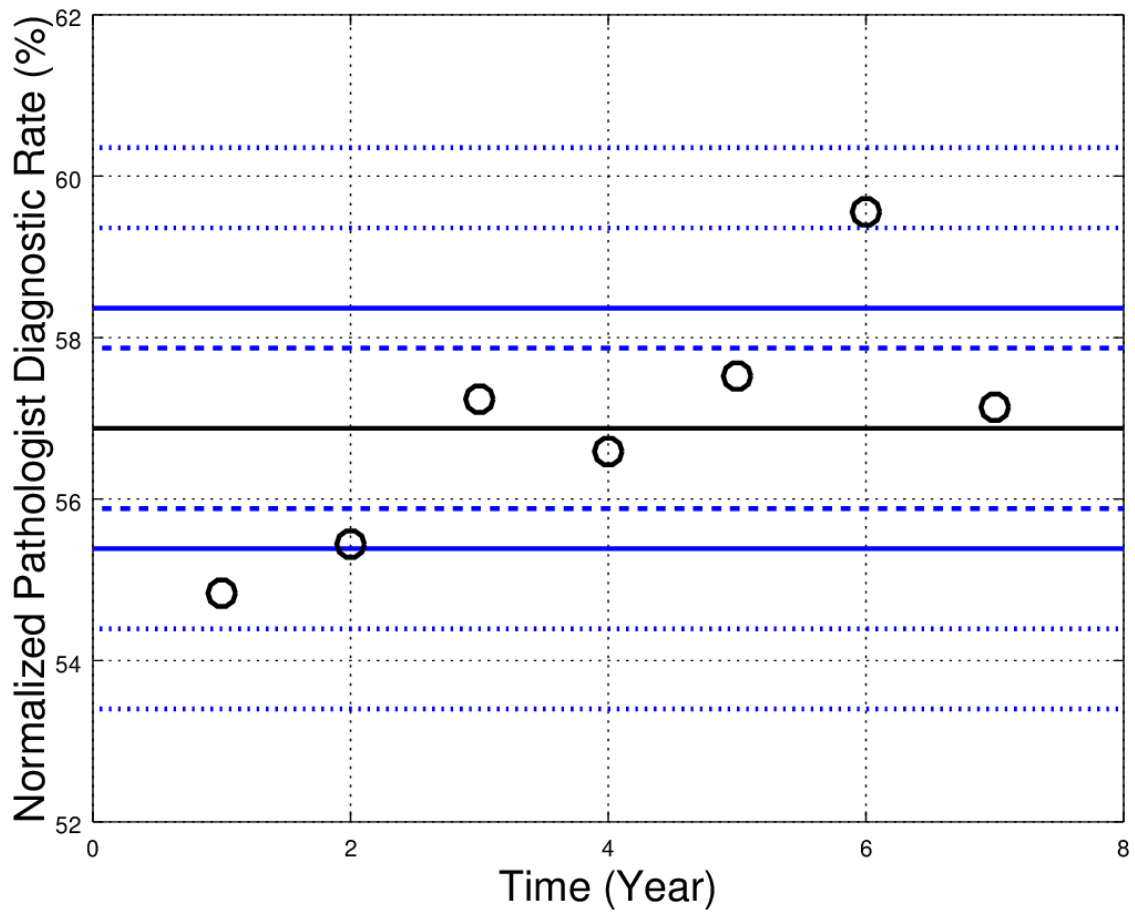

**Supplemental Figure G: Mean call rate of tubular adenoma+tubulovillous adenoma+villous adenoma+adenoma not otherwise specified (TA+TVA+VA+ad) for each year of the study. The control lines are centred on the average call rate over the seven years of the study.**



# Control Chart for Ifcr

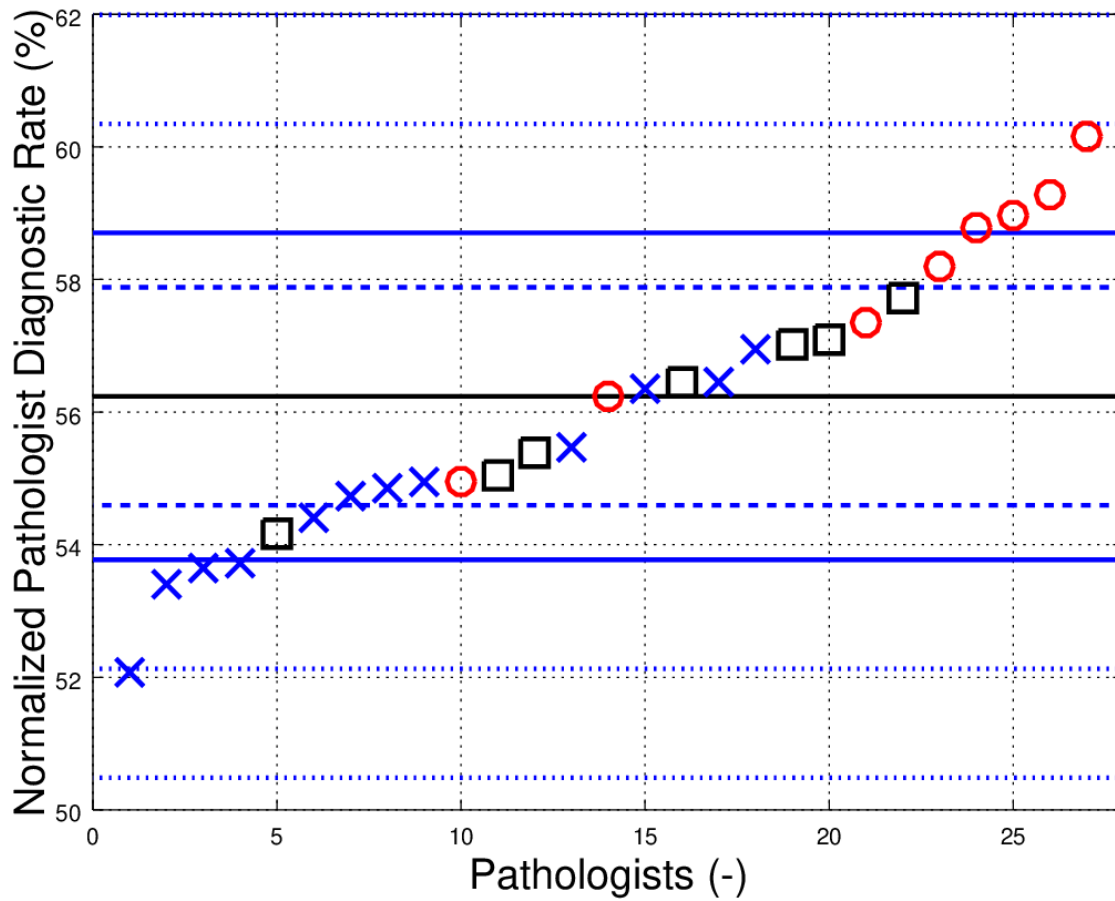

**Supplemental Figure H: Normalized left colon/rectum cases by pathologist. The control lines are centred on the average rate over the seven years of the study. This data is not influenced by pathologist interpretation; it is based only on what was on the pathology requisition.**

# Control Chart for midcr

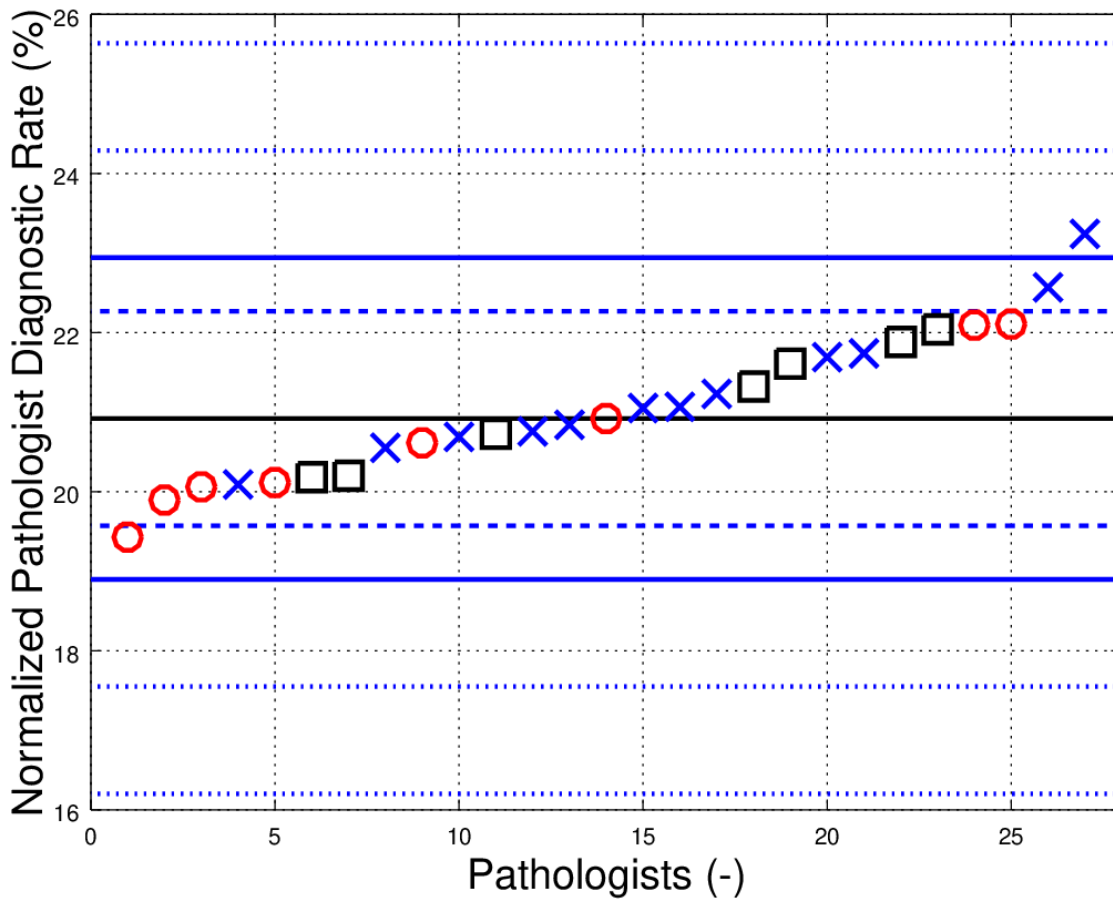

**Supplemental Figure I: Normalized mid colon cases by pathologist; mid colon includes splenic flexure, transverse colon and hepatic flexure. The control lines are centred on the average rate over the seven years of the study. This data is not influenced by pathologist interpretation; it is based only on what was on the pathology requisition.**

# Control Chart for r<sub>tc</sub>

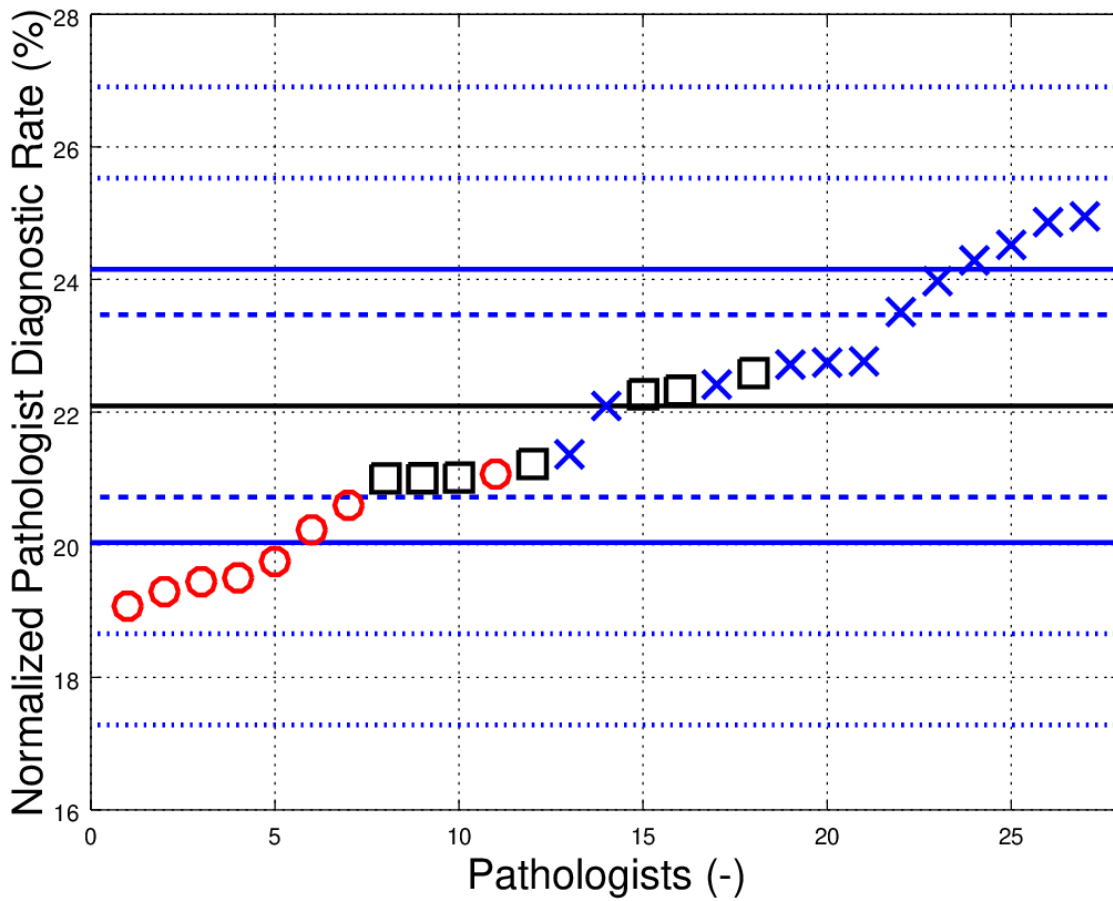

**Supplemental Figure J: Normalized right colon cases by pathologist. The control lines are centred on the average rate over the seven years of the study. This data is not influenced by pathologist interpretation; it is based only on what was on the pathology requisition.**

**Table S1: Colorectal Polyp Specimens – Cohort Overview**

| <b>Diagnosis</b>                   | <b>Number</b> | <b>Percent</b> |
|------------------------------------|---------------|----------------|
| High-grade dysplasia (HGD)         | 1117          | 1.7            |
| Tubular adenoma (TA)               | 30215         | 47.1           |
| Hyperplastic polyp (HP)            | 17645         | 27.5           |
| Tubulovillous adenoma (TVA)        | 3561          | 5.6            |
| Villous adenoma (VA)               | 384           | 0.6            |
| Sessile serrated adenoma (SSA)     | 2480          | 3.9            |
| Adenoma NOS                        | 3216          | 5.0            |
| Traditional serrated adenoma (TSA) | 101           | 0.2            |
| Adenocarcinoma                     | 296           | 0.5            |
| <b>Lumped categories</b>           |               |                |
| TA + adenoma NOS (TA_ad)           | 33431         | 52.1           |
| TVA + VA                           | 3945          | 6.2            |
| Negative for pathology             | 5424          | 8.5            |
| <b>Total specimens</b>             | <b>64115</b>  | <b>100.0</b>   |

**Table S1: Overview of colorectal polyp specimens, selected categories. NOS = not otherwise specified. It should be noted that the diagnoses are not mutually exclusive as several polyps can be submitted within the same container**

**Table S2: Fraction that are Outliers by Self, Site, and all 27 Pathologists**

| Variation | To self<br>HGD | To site<br>HGD | To all 27<br>HGD |
|-----------|----------------|----------------|------------------|
| <2 SD     | 0.91           | 0.59           | 0.41             |
| >2 SD     | 0.09           | 0.41           | 0.59             |
| >3 SD     | 0.02           | 0.22           | 0.44             |
| >5 SD     | 0.00           | 0.04           | 0.00             |
| >7 SD     | 0.00           | 0.04           | 0.00             |

| Variation | To self<br>TVA+VA | To site<br>TVA+VA | To all 27<br>TVA+VA |
|-----------|-------------------|-------------------|---------------------|
| <2 SD     | 0.77              | 0.33              | 0.22                |
| >2 SD     | 0.23              | 0.67              | 0.78                |
| >3 SD     | 0.10              | 0.52              | 0.59                |
| >5 SD     | 0.02              | 0.37              | 0.33                |
| >7 SD     | 0.01              | 0.11              | 0.19                |

| Variation | To self<br>TA_ad | To site<br>TA+adN | To all 27<br>TA_ad |
|-----------|------------------|-------------------|--------------------|
| <2 SD     | 0.78             | 0.63              | 0.52               |
| >2 SD     | 0.22             | 0.37              | 0.48               |
| >3 SD     | 0.08             | 0.19              | 0.33               |
| >5 SD     | 0.01             | 0.11              | 0.11               |
| >7 SD     | 0.00             | 0.07              | 0.11               |

| Variation | To self<br>HP | To site<br>HP | To all 27<br>HP |
|-----------|---------------|---------------|-----------------|
| <2 SD     | 0.69          | 0.41          | 0.30            |
| >2 SD     | 0.31          | 0.59          | 0.70            |
| >3 SD     | 0.10          | 0.52          | 0.70            |
| >5 SD     | 0.00          | 0.37          | 0.41            |
| >7 SD     | 0.00          | 0.15          | 0.15            |

| Variation | To self<br>SSA | To site<br>SSA | To all 27<br>SSA |
|-----------|----------------|----------------|------------------|
| <2 SD     | 0.68           | 0.41           | 0.22             |
| >2 SD     | 0.32           | 0.59           | 0.78             |
| >3 SD     | 0.17           | 0.56           | 0.70             |
| >5 SD     | 0.10           | 0.44           | 0.48             |
| >7 SD     | 0.05           | 0.26           | 0.30             |

Table S2: Fraction that are outliers by diagnosis and self, (hospital) site and group of 27 pathologists that read >600 colorectal polyp specimens (CRPS). This table is synthesized from Table 1b, Table 2b and Table 2d. The “to self” column is based on 15 pathologists over 7 years; pathologist are compared to their mean call rate. The “to site” comparison is based on 27 pathologists at three hospital sites; each pathologist is compared to the group median diagnostic rate (GMDR) for the hospital. In “to all 27”, pathologists are compared to the GMDR of the whole group of 27.

**Table S3: Median Call Rates by Hospital Site and Group of 27 Pathologists**

| Group       | HGD   | HP    | SSA   | TVA+VA | TA+ad | HP+SSA | Lump ad | Left CR | Mid CR | Right CR |
|-------------|-------|-------|-------|--------|-------|--------|---------|---------|--------|----------|
| Site 1      | 0.020 | 0.308 | 0.023 | 0.076  | 0.488 | 0.329  | 0.553   | 0.586   | 0.203  | 0.192    |
| Site 2      | 0.009 | 0.266 | 0.007 | 0.043  | 0.528 | 0.284  | 0.579   | 0.544   | 0.211  | 0.236    |
| Site 3      | 0.026 | 0.224 | 0.031 | 0.068  | 0.540 | 0.224  | 0.604   | 0.566   | 0.215  | 0.207    |
| Group of 27 | 0.017 | 0.268 | 0.019 | 0.061  | 0.527 | 0.282  | 0.578   | 0.562   | 0.209  | 0.221    |

**Table S3: Median diagnostic call rates by group. “Site 1”, “Site 2” and “Site 3” are the three hospital sites. “Group of 27” is the 27 pathologists that interpreted >600 CRPS each. “Lump ad” is the lumping of the “traditional” adenomas (TA+TVA+VA+ad). “Left CR” is the left colon/rectum. “Mid CR” is the transverse colon and the flexures. “Right CR” is the right colon/cecum.**
